# Supplementary material for: Comprehensive Analysis of Differentially Expressed Unigenes under NaCl Stress in Flax (Linum usitatissimum L.) Using RNA-Seq
Source: MDPI journal article supplement (doi:10.3390/ijms20020369), 2019-01-16
Supplement: s1 [file s1]

**Table S1.** The regulated unigenes in different periods. C-vs-N1, C-vs-N2 and C-vs-N4 representing the DEUs under the exposure time of 12h, 24h and 48h in NaCl solution, respectively. Common means the common genes in different periods.

**Table S2.** Annotation of the co-expressed unigenes in flax. The DEUs were annotated in the public database of Pfam, KOG, KEGG, KO and GO; The annotated results with *Arabidopsis thaliana* genome list in Best-hit arabi, Arabi-symbol and Arabi-defline.

**Table S3.** The developed EST-SSRs with primer pairs.

**Table S4.** Primer sequences for qRT-PCR. AY857865, is the *L. ussitatissimum Act1* gene, here as the internal reference gene.
